# Supplementary material for: Loss of Cholinergic and Monoaminergic Afferents in APPswe/PS1ΔE9 Transgenic Mouse Model of Cerebral Amyloidosis Preferentially Occurs Near Amyloid Plaques
Source: MDPI journal article supplement (doi:10.3390/ijms25095004), 2024-05-03
Supplement: s1 [file s1]

# **Supplementary File 1**

Supplementary Figures S1-S4

For

Loss of cholinergic and monoaminergic afferents in transgenic mouse model of cerebral amyloidosis preferentially occur near the amyloid Plaques.

Gang Chen and Michael K. Lee

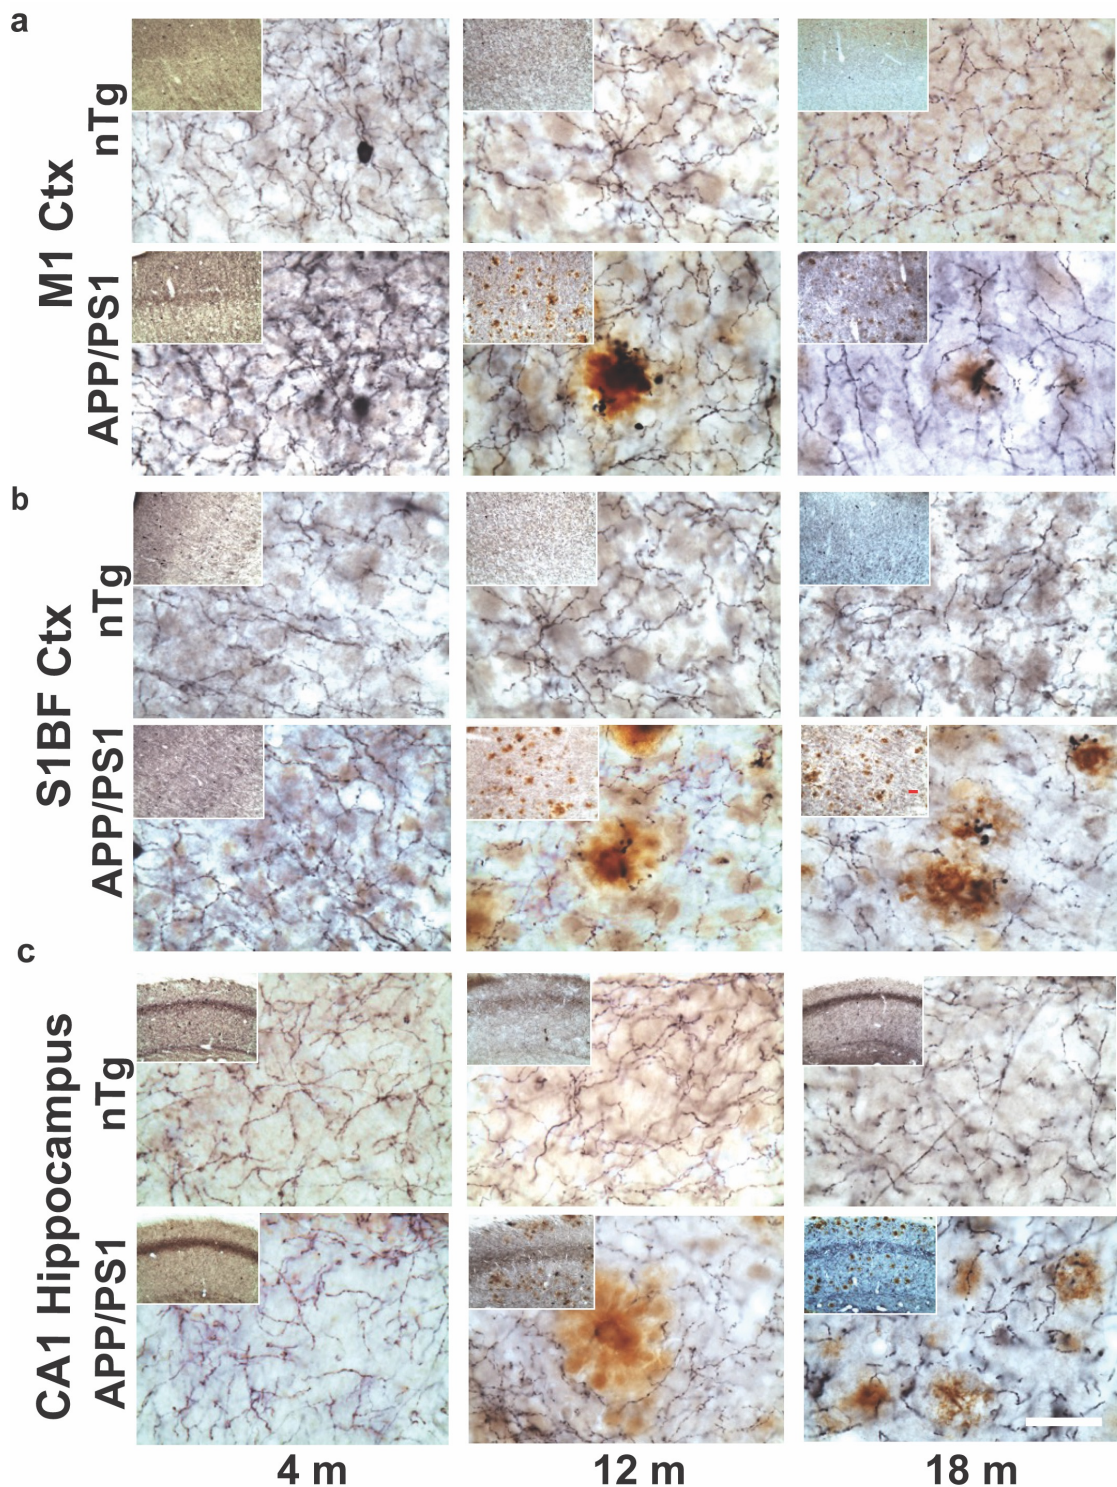

**Figure S1. Large images showing Ach axons in the cortex and hippocampus of APP/PS1 model.** Representative micrographs of Ach fibers (dark blue) stained with anti-ChAT antibody and amyloid plaques (brown) stained with 6E10 antibody in the Primary motor cortex (M1 Ctx, **a**), Barrel Field (S1BF, **b**), and CA1-Hippocampus (**c**) area at 4-, 12-, and 18-months (m) of age. Inset show a lower magnification image showing increased number of amyloid deposits in older mice. Scale bar=50  $\mu$ m,

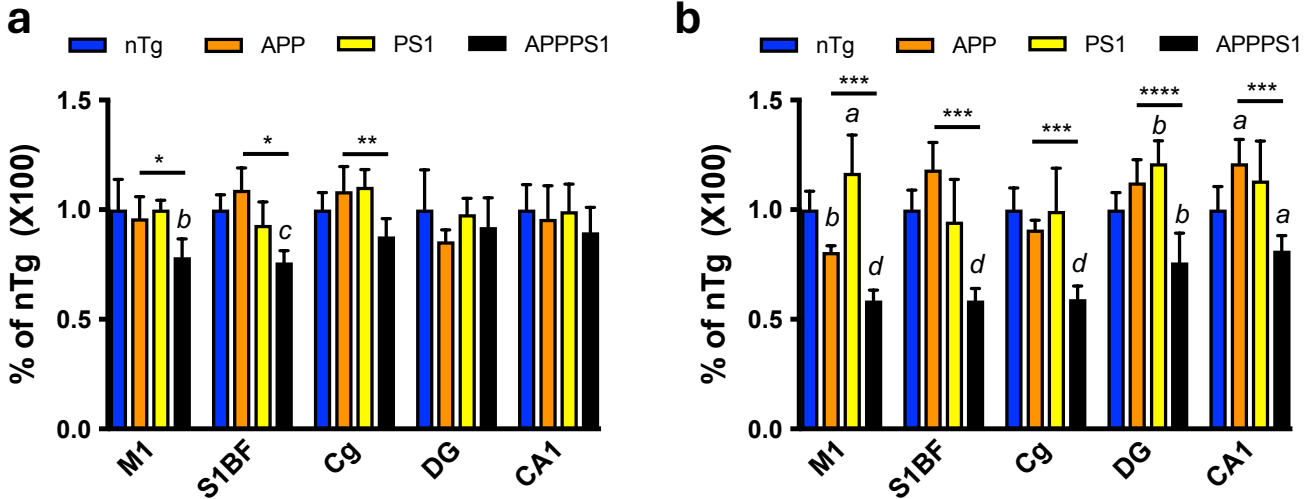

**Figure S2.** ChAT+ fiber density, relative to the average of nTg mice, in all genotypes at 12 months **(a)** and 18 months **(b)** of age. Plotted are mean  $\pm$  SD. **a)** Significantly lower ChAT+ afferents, compared to nTg, are seen in cortical regions (M1, S1BF) from APP/PS1 mice. *b*,  $p < 0.01$ ; *c*,  $p < 0.001$  vs nTg. One-way ANOVA, Tukey's multiple comparison test,  $n = 6$ . There is no differences in ChAT+ afferent integrity in Cg, DG, or CA1 compared to nTg mice. However, ChAT+ afferent density is lower in Cg APP/PS1 mice compared to the APP-alone or PS1-alone.  $*p < 0.05$ ,  $**p < 0.01$ , APP/PS1 vs APP-alone/PS1-alone, One-way ANOVA, Tukey's multiple comparison test. **b)** APP/PS1 mice show significant loss of ChAT+ afferents at 18 months of age in all brain regions. Single transgenic APP and PS1 mice are comparable to nTg mice except where indicated. *a*,  $p < 0.05$ , *b*,  $p < 0.01$ ; *d*,  $p < 0.0001$  vs nTg. One-way ANOVA, Tukey's multiple comparison test,  $n = 7$ .  $***p < 0.001$ ,  $****p < 0.0001$ , APP/PS1 vs APP-alone/PS1-alone, One-way ANOVA, Tukey's multiple comparison test. Primary Motor Cortex (M1), Primary Sensory Barrel Field (S1BF), Cingulate Cortex (Cg), Dentate gyrus-Hippocampus (DG), and CA1-hippocampus.

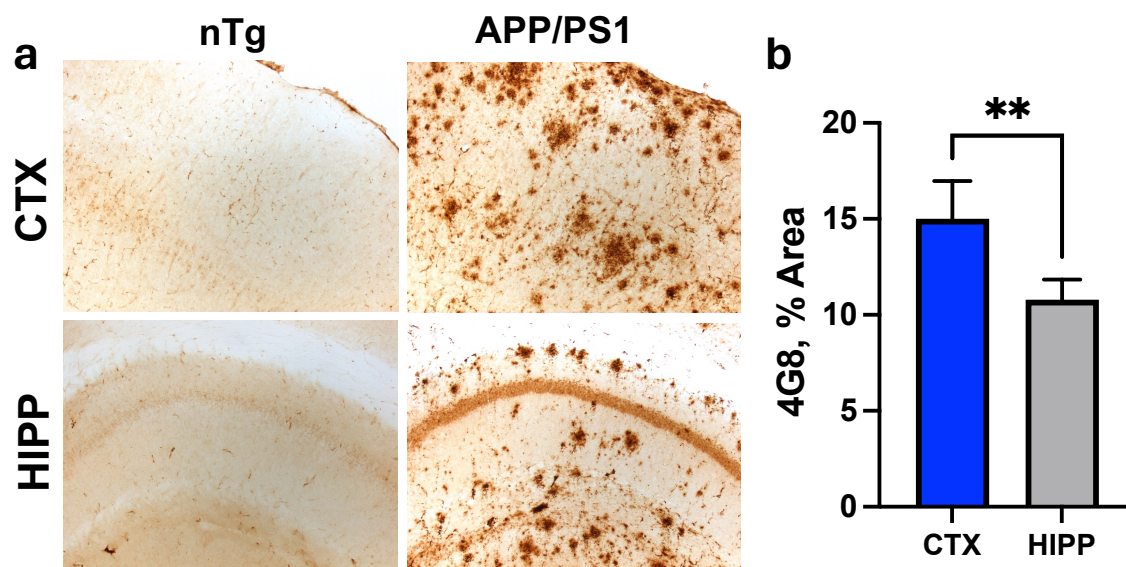

**Figure S3.** Amyloid pathology is higher in the cortex than in the hippocampus. **a)** Representative 4G8 immunostained images of Cortex (CTX) and CA1 areas of Hippocampus (HIPP) of 12-month-old nTg and APP/PS1 mice. **b)** Quantitative analysis of the total area covered by 4G8 immunoreactivity (mean  $\pm$  SEM) showing higher levels of amyloid pathology in CTX.  $**p < 0.01$ , unpaired *t*-test,  $n=4$ .

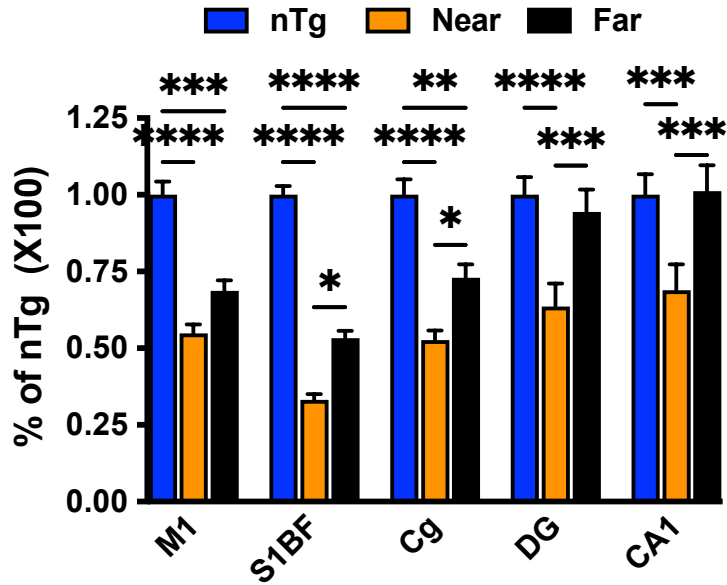

**Figure S4.** Using the scheme outlined in Figure 3, ChAT+ fiber density in 18-month APP/PS1 animals was determined as a function of distance from A $\beta$  deposits. The values were normalized to average density in nTg mice. Unlike in 12-month-old mice, some brain areas (M1, S1BF, and DG) show global loss of ChAT+ afferents at both near and far from A $\beta$  deposits. Plotted are mean  $\pm$  SEM. \* $p < 0.05$ , \*\* $p < 0.01$ , \*\*\* $p < 0.001$ , \*\*\*\* $p < 0.0001$ , Two-way ANOVA, Tukey's multiple comparison test,  $n = 7$ .
